# Supplementary material
Source: PubMed Central journal article supplement (PMC6637737)
Supplement: NIHMS1039710-supplement-Suppl_Mat.pdf [file NIHMS1039710-supplement-Suppl_Mat.pdf]

## Supplementary Materials for

### **MEG3-4 is a miRNA decoy that regulates IL-1 $\beta$ abundance to initiate and then limit inflammation to prevent sepsis during lung infection**

Rongpeng Li, Lizhu Fang, Qinqin Pu, Huimin Bu, Pengcheng Zhu, Zihan Chen, Min Yu, Xuefeng Li, Timothy Weiland, Arvind Bansal, Shui Qing Ye, Yuquan Wei, Jianxin Jiang,\* Min Wu\*

\*Corresponding author. Email: min.wu@med.und.edu (M.W.); hellojxx@126.com (J.J.)

Published 26 June 2018, *Sci. Signal.* **11**, eaao2387 (2018)

DOI: 10.1126/scisignal.aao2387

#### **This PDF file includes:**

- Fig. S1. Characterization of lncRNA MEG3.
- Fig. S2. MEG3-4 inhibition signaling in alveolar macrophage cells is TLR4-specific during *S. aureus* infection.
- Fig. S3. Immunoblotting validation of signaling factors in inhibitor- or activator-treated MH-S cells.
- Fig. S4. Dissection of signaling molecules in PAO1-infected MH-S cells.
- Fig. S5. Densitometric quantification of the immunoblotting data.
- Fig. S6. Restoration of the phenotype in a MEG3-4-overexpressing model.
- Fig. S7. Imaging of pyroptosis in MH-S cells.
- Fig. S8. Functional analysis of miRNAs generated by MEG3-4.
- Fig. S9. miR-138 regulates IL-1 $\beta$  expression and cell viability in alveolar macrophages.
- Fig. S10. miR-138 enhances host defense against *P. aeruginosa* by repressing IL-1 $\beta$  expression in mouse lungs.
- Fig. S11. MEG3-4 overexpression phenotypes in mice were reversed by treatment with 138-m.
- Fig. S12. Analysis of MEG3 function and expression in human alveolar macrophages.
- Fig. S13. MEG3-4 overexpression inhibits p53 expression in mouse B16 melanoma tumor cells.
- Table S1. lncRNA expression in response to PAO1 infection.
- Table S2. Primers used in this study.

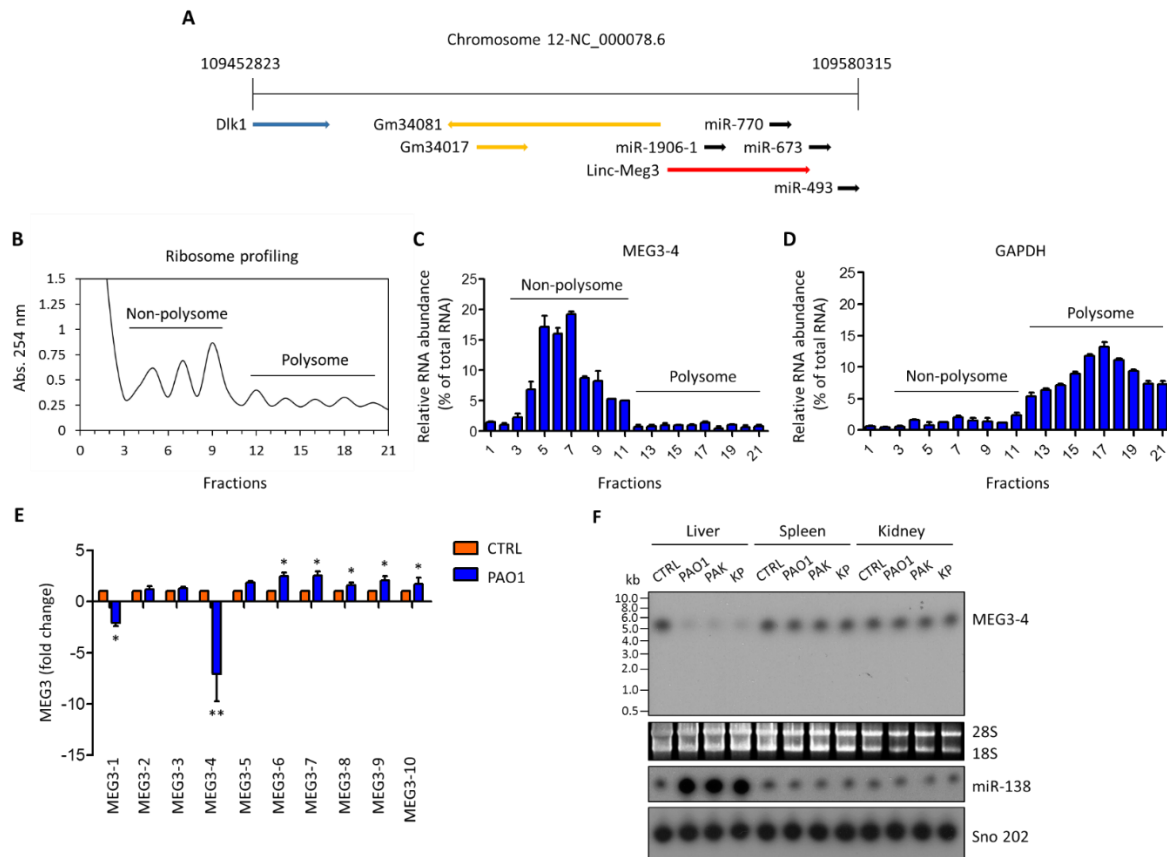

**Figure S1. Characterization of lncRNA MEG3.** (A) Schematic of the gene *Meg3* located in chromosome 12, without overlapping with protein coding genes but overlapping with miR-1906-1 and miR-770. One protein-coding gene [*Delta-like 1 homolog (Dlk1)*], two predicted genes (*Gm34081* and *Gm34017*), and two miRNAs (miR-493 and miR-673) neighbor *Meg3*. (B) The polyribosome and non-polyribosome fractions, as shown by the profile of the absorbance at 254 nm, were separated by sucrose gradient centrifugation of mouse lung homogenates. Data are representative of n=3 mice. (C) The abundance of MEG3-4 transcripts in the polyribosome and non-polyribosome fractions as measured by qPCR and normalized to total MEG3 in all the fractions. (D) The abundance of *Gapdh* transcripts in the polyribosome and non-polyribosome fractions as measured by qPCR normalized to total *Gapdh* in all the fractions. (E) C57BL/6J mice (n = 3) were intranasally infected with  $5 \times 10^6$  colony forming units (CFU) of PAO1 per mouse for 24 hours. qPCR analysis of individual MEG3 transcript expression in PAO1-infected mouse lungs. CTRL: control. (F) Northern blotting analysis of MEG3-4 and miR-138 expression in mouse livers, spleens, and kidneys after PAO1, PAK, or KP infection. Detection of 18S and 28S rRNA and Sno202 snRNA was used as loading controls for MEG3-4 and miR-138, respectively. Data in (B) and (F) are representative of n=3 mice. Data in (C-E) are means  $\pm$  SD for three independent mouse lungs. \* $P \leq 0.05$ , \*\* $P \leq 0.01$  by Kruskal-Wallis test.

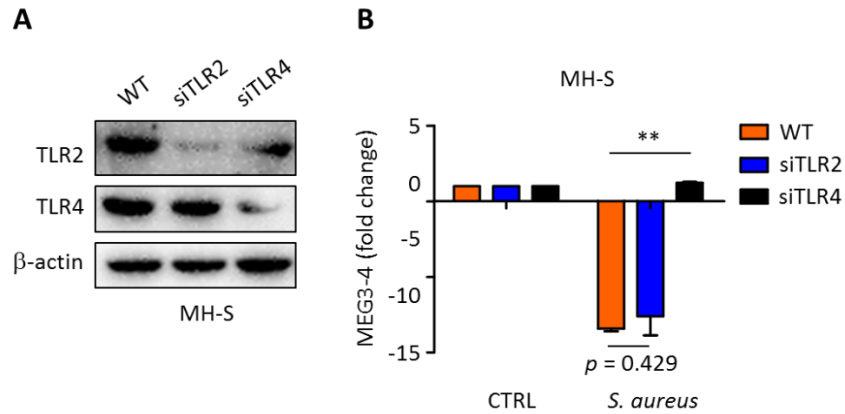

**Figure S2. MEG3-4 inhibition signaling in alveolar macrophage cells is TLR4-specific during *S. aureus* infection.** (A) Murine alveolar macrophage MH-S cells were transfected with control siRNA (siNC), TLR2 siRNA (siTLR2) or TLR4 siRNA (siTLR4) for 48 hours, then TLR2 and TLR4 abundance was measured by immunoblotting (representative of n=3 experiments). (B) Change in MEG3-4 abundance in siNC-, siTLR2- or siTLR4-transfected MH-S cells infected with *S. aureus* at 20:1 MOI for 2 hours relative to controls (CTRL). Data are mean  $\pm$  SD of n=3 experiments. \*\* $P \leq 0.01$  by Kruskal-Wallis test.

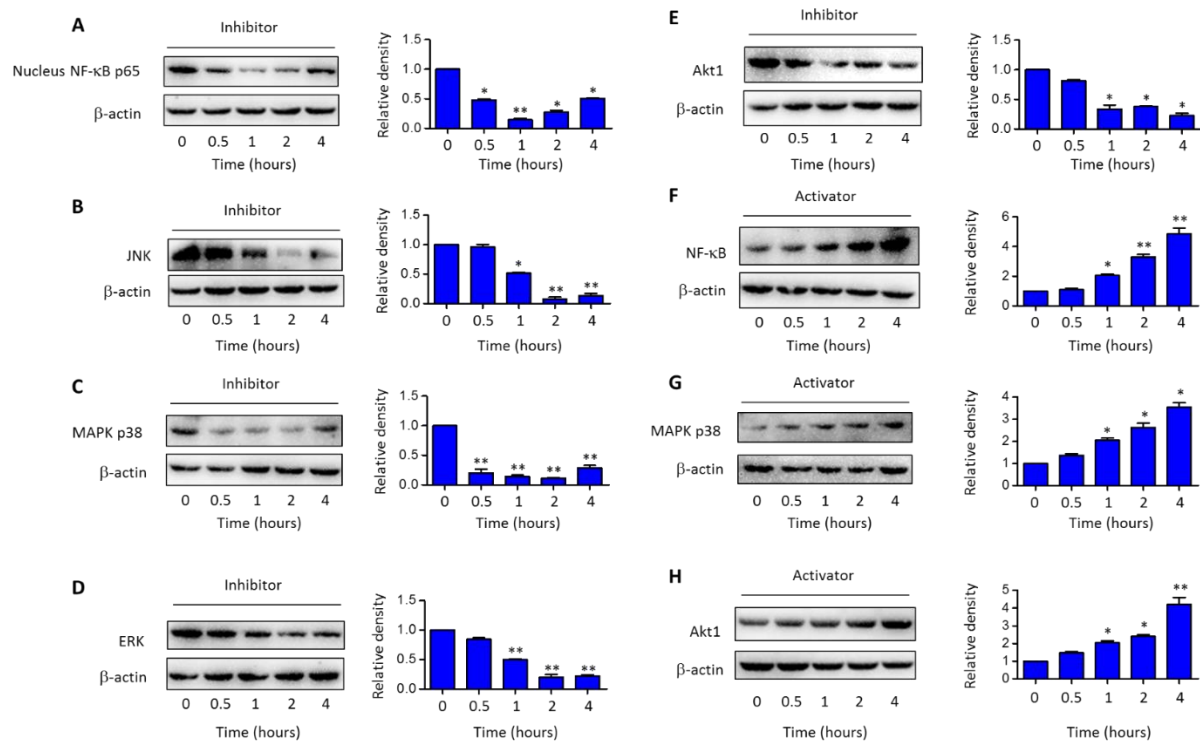

**Figure S3. Immunoblotting validation of signaling factors in inhibitor- or activator-treated MH-S cells.** (A-H) Immunoblotting assessment of the abundance of select proteins after MH-S cells were treated with the indicated signaling pathway activators or inhibitors: NF- $\kappa$ B inhibitor SN50 (A), JNK inhibitor SP600125 (B), p38 inhibitor SB203580 (C), ERK inhibitor FR180204 (D), AKT inhibitor GSK690693 (E), NF- $\kappa$ B activator betulinic acid (F), JNK/p38 activator anisomycin (G), and AKT activator SC79 (H), each at 10 nM for 4 hours. Blots are representative and data are means  $\pm$  SD of three independent cell samples. \* $P \leq 0.05$ , \*\* $P \leq 0.01$  by Kruskal-Wallis test.

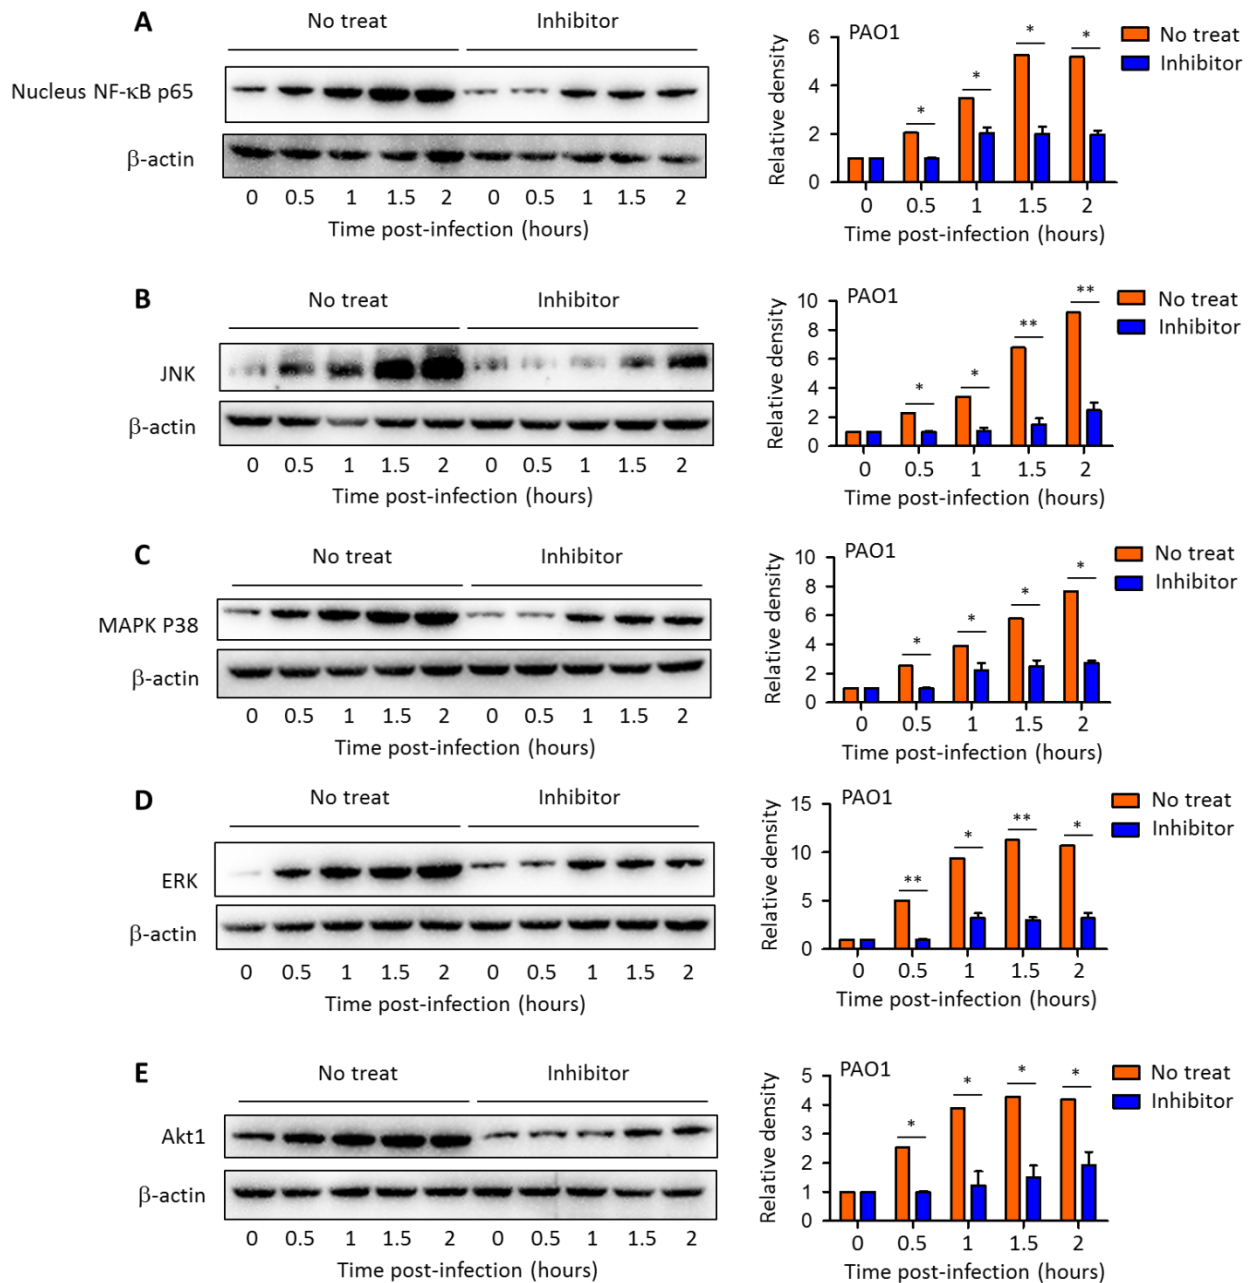

**Figure S4. Dissection of signaling molecules in PAO1-infected MH-S cells.** (A-E) Immunoblotting assessment of the abundance of select proteins in MH-S cells that were pretreated for 4 hours with the indicated signaling pathway inhibitor (as described in fig. S3) and then infected with PAO1 (for 2 hours at MOI of 20:1). Blots are representative and data are means  $\pm$  SD of three independent cell samples. ; \* $P \leq 0.05$ , \*\* $P \leq 0.01$  by Kruskal-Wallis test.

**A** Related to Fig 2G

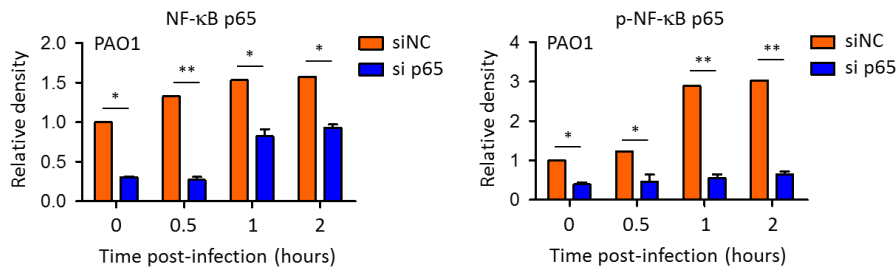

**B** Related to Fig 4D

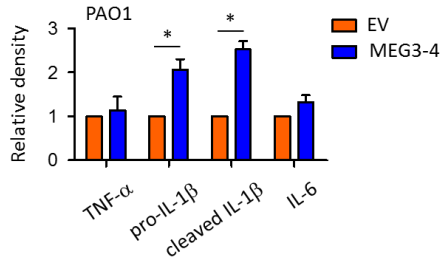

**C** Related to Fig 4G

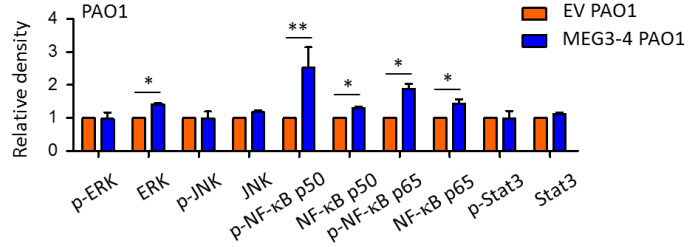

**D** Related to Fig 4H

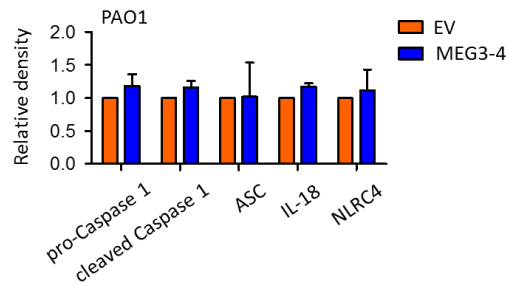

**E** Related to Fig 6F

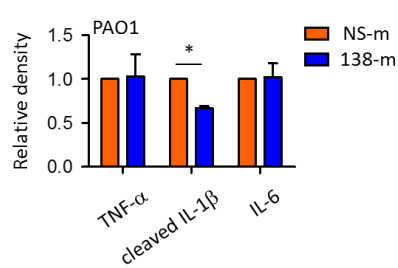

**Figure S5. Densitometric quantification of the immunoblotting data. (A-E)** Densitometric analysis of the immunoblots represented in, Fig. 2G (A), Fig. 4D (B), Fig. 4G (C), Fig. 4H (D), and Fig. 6F (E) using Quantity One software. Data are means  $\pm$  SD of three reproducible gels. \* $P \leq 0.05$ , \*\* $P \leq 0.01$  by Kruskal-Wallis test. siNC: nonspecific control siRNA; si p65: NF-κB p65 siRNA; EV: empty vector; NS-m: nonspecific control mimics; 138-m: miR-138 mimics.

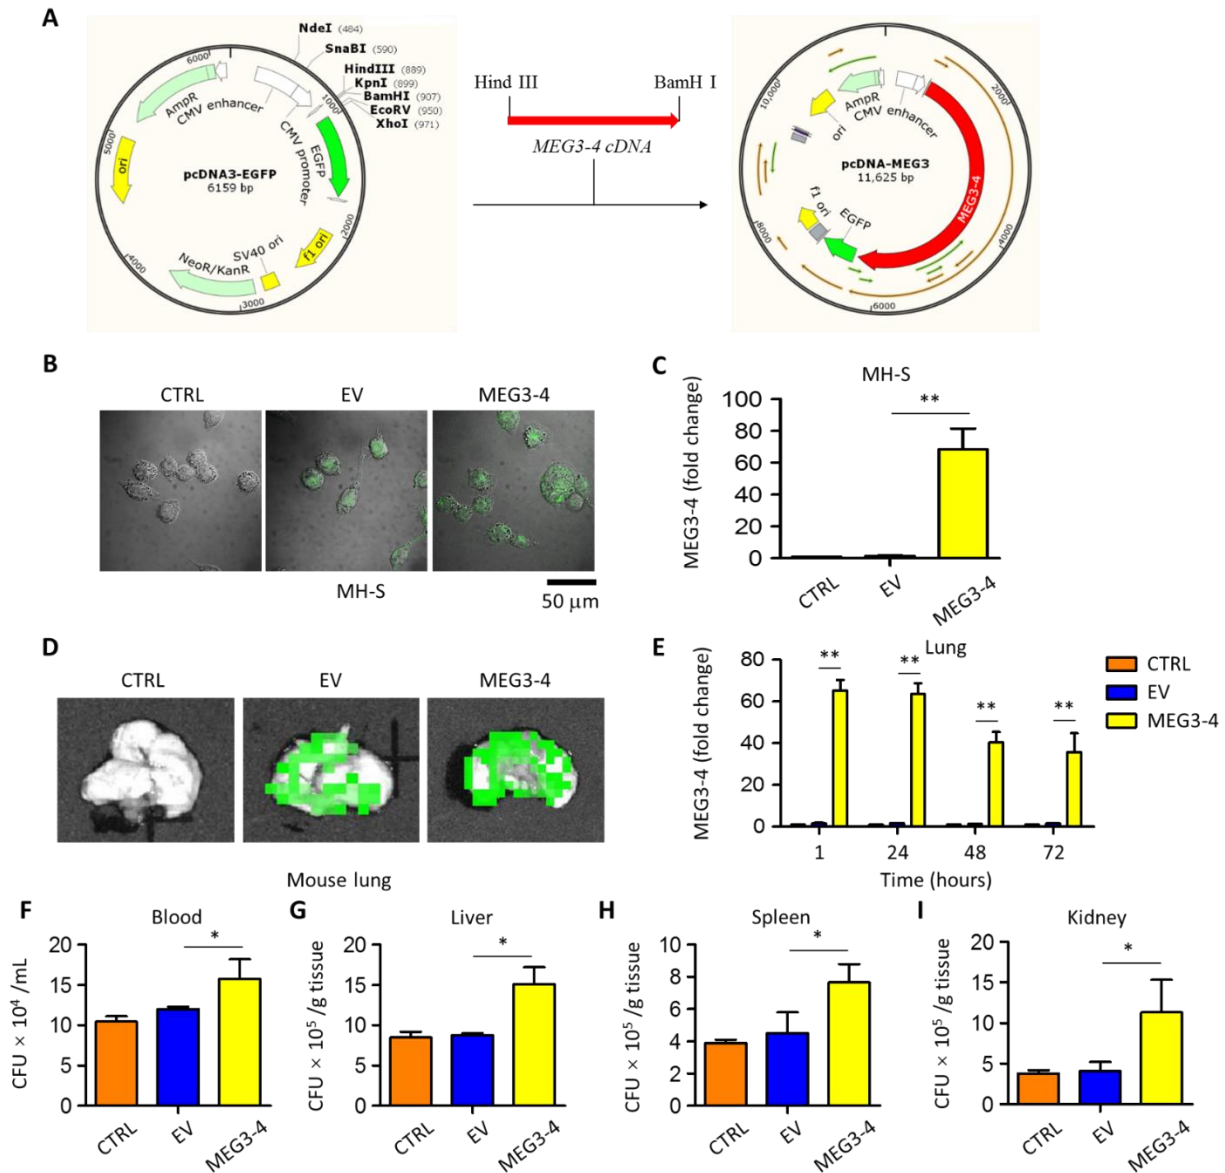

**Figure S6. Restoration of the phenotype in a MEG3-4-overexpressing model.** (A) Diagram of pcDNA3.1-MEG3-4 (pWT-MEG3) construction. (B) Confocal microscopy of MH-S cells stably transfected with pWT-MEG3 or empty vector (EV; pcDNA3-EGFP). Successful plasmid expression in MH-S cells was confirmed by the enhanced green fluorescent protein (EGFP) marker. CTRL: control, untransfected cells. Scale bar: 50  $\mu$ m. (C) qRT-PCR analyzed MEG3-4 expression in pWT-MEG3-transfected MH-S cells. (D) IVIS XRii in vivo imaging of lungs from C57BL/6J mice 72 hours after intranasal infusion with pWT-MEG3-transfected MH-S cells ( $5 \times 10^6$  cells for each MEG3-4 mouse). EGFP signal marks pWT-MEG3 expression. Images are representative of  $n = 3$  mice. (E) qRT-PCR analysis of MEG3-4 expression in lungs from mice described in (D). (F-I) Bacterial burdens in the blood, liver, spleen and kidneys of mice described in (D) and infected with PAO1 for 24 hours. Data in (B) and (D) are representative of three independent experiments (cell samples or mice). Data in (C and F-I) are means  $\pm$  SD of three independent experiments (cell samples or mice). \* $P \leq 0.05$ , \*\* $P \leq 0.01$  by Kruskal-Wallis test.

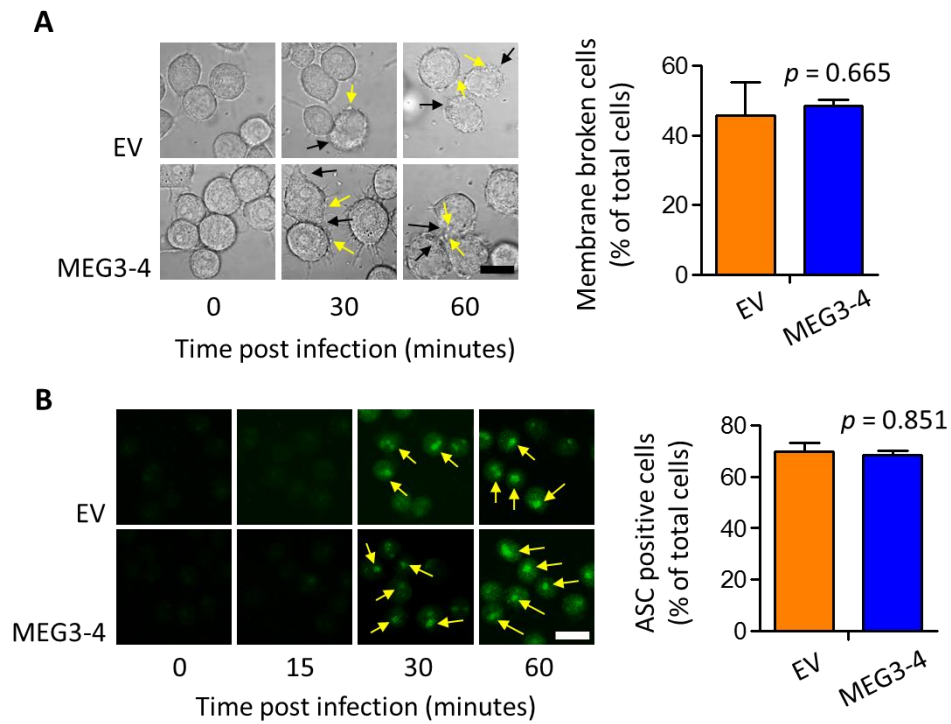

**Figure S7. Imaging of pyroptosis in MH-S cells.** (A) Confocal microscopy of plasma membrane rupture (black arrows) and membrane vesicles (yellow arrows) in empty vector (EV; pcDNA3-EGFP)- or MEG3-4-transfected MH-S cells that were infected with PAO1 (at an MOI of 20:1 for 0-60 minutes). Scale bar: 20  $\mu$ m. (B) Confocal laser scanning microscopy (CSLM) the production of ASC (yellow arrows) in MH-S cells described in (A). Scale bar, 20  $\mu$ m. Graphs, right: Images are representative and data are means  $\pm$  SD of random 100 cells in three independent cell samples. Data were analyzed by Kruskal-Wallis test.



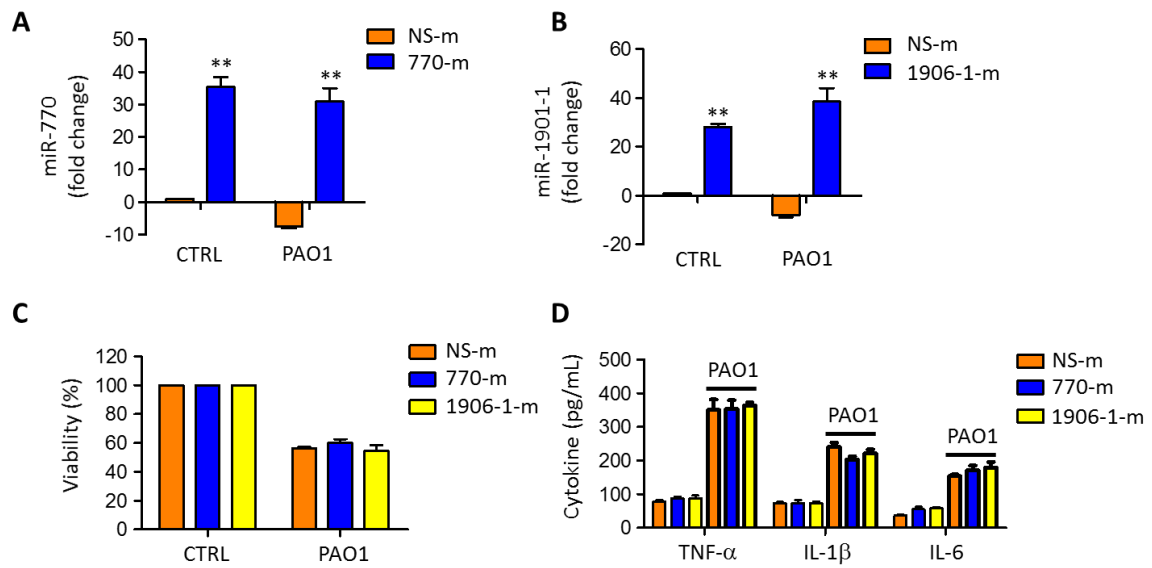

**Figure S8. Functional analysis of miRNAs generated by MEG3-4.** (A-B) qRT-PCR analysis of miR-770 and miR-1906-1 expression in MH-S cells transfected with nonspecific mimics (NS-m), miR-770 mimics (770-m), or miR-1906-1 mimics (1906-1-m; 50 ng) for 24 hours then infected with PAO1 (at an MOI of 20:1) for 2 hours. (C) Viability of the cells described in (A-B) as determined by MTT assay at a wavelength of 570 nm. (D) Abundance of inflammatory cytokines in the cells described in (A-B) as assessed by ELISA. Data are means  $\pm$  SD of three independent cell samples. \*\* $P \leq 0.01$  by Kruskal-Wallis test.

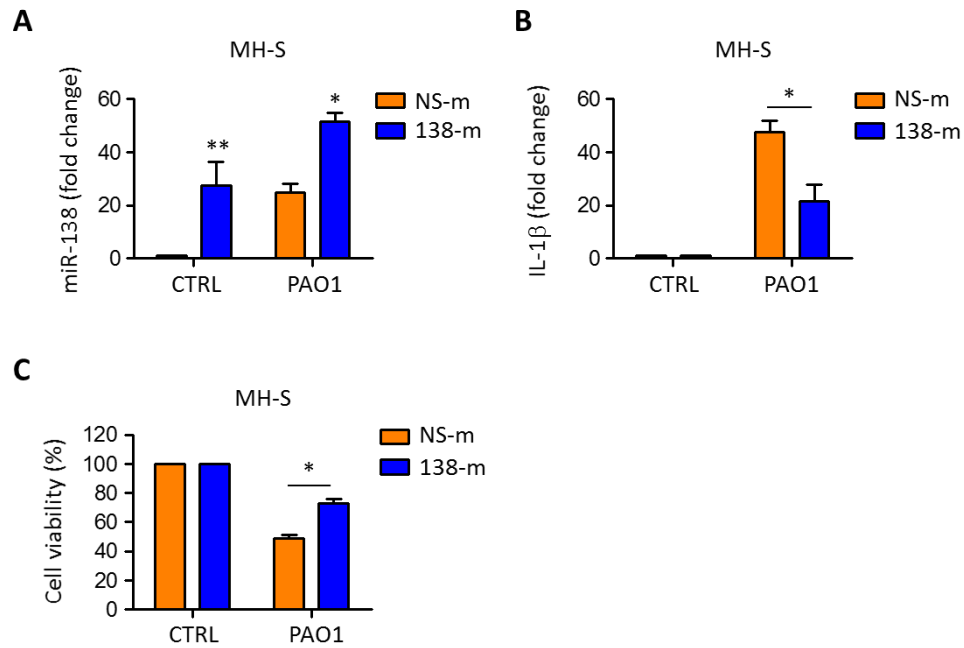

**Figure S9. miR-138 regulates IL-1 $\beta$  expression and cell viability in alveolar macrophages.** (A-B) qRT-PCR analysis of the abundance of miR-138 (A) and IL-1 $\beta$ -encoding mRNA (B) in MH-S cells that were transfected with nonspecific control mimics (NS-m) or miR-138 mimics (138-m; 50 ng) for 24 hours and then infected with PAO1 (at an MOI of 20:1) for 30 minutes. (C) Viability of the cells described in (A and B) were measured by MTT assay. Data are means  $\pm$  SD of three independent cell samples. \* $P \leq 0.05$ , \*\* $P \leq 0.01$  by Kruskal-Wallis test.

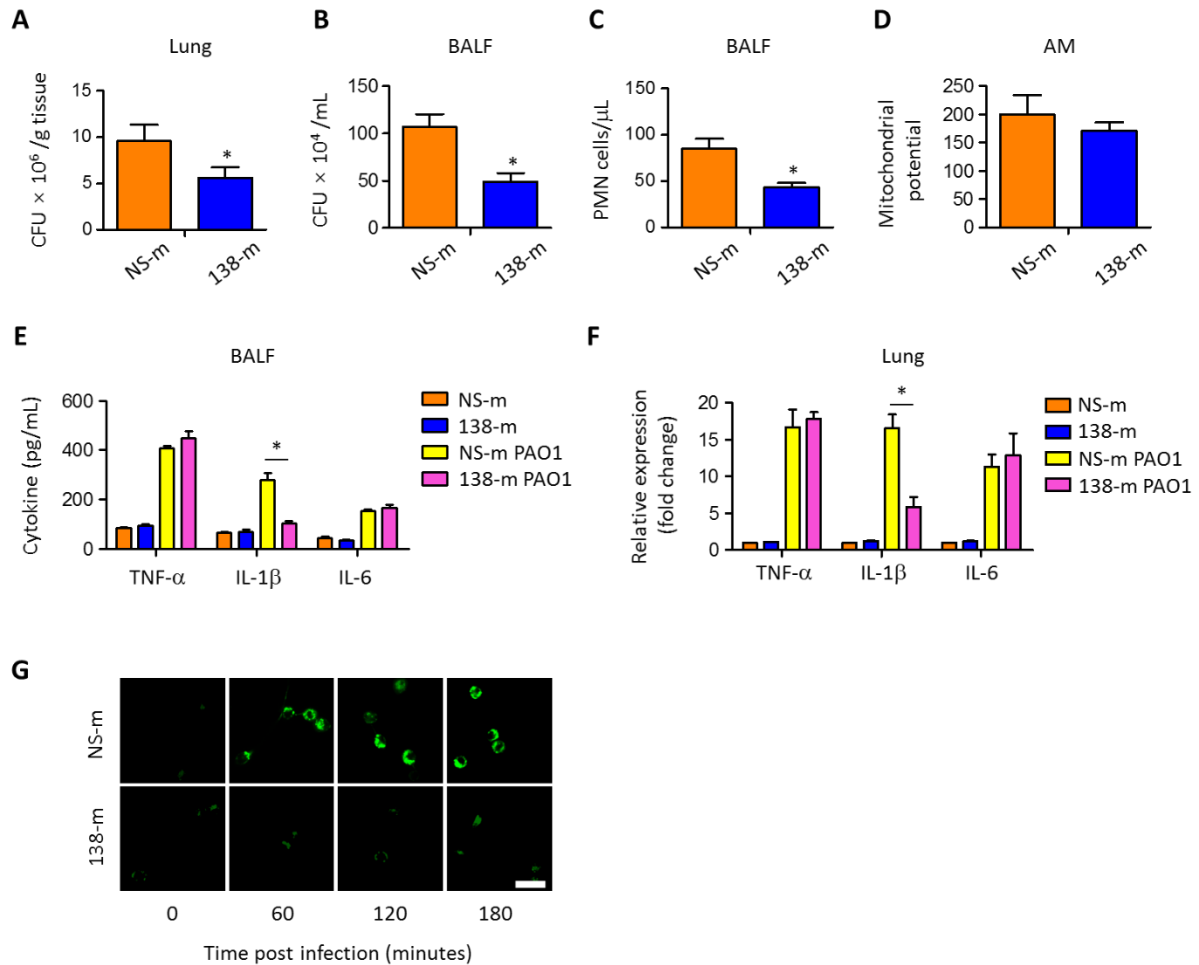

**Figure S10. miR-138 enhances host defense against *P. aeruginosa* by repressing IL-1 $\beta$  expression in mouse lungs.** (A-B) Bacterial burden in the lungs and bronchoalveolar lavage fluid (BALF) from mice first i.v. injected with miR-138 mimics (138-m) or a nonspecific control mimic (NS-m) then intranasally infected with  $5 \times 10^6$  CFU of PAO1 for 24 hours was determined by plating samples on agar dishes. (C) PMN cell percentage relative to total nuclear cells was evaluated in BALF from mice described in (A-B), assessed by HEMA-3 staining. (D) Mitochondrial potential of alveolar macrophages measured by JC-1 fluorescence assay. (E) Cytokine levels in BALF from mice described in (A-B) as assessed by ELISA. (F) Expression of cytokines in the lungs from mice described in (A-B) as assessed by qRT-PCR. (G) Alveolar macrophages were isolated from wild-type mouse lungs and transfected in culture with NS-m or miR-138 mimics (50 ng) for 24 hours then challenged with PAO1 (at an MOI of 20:1) for 0-120 min. Confocal laser scanning microscopy (CSLM) then assessed the abundance of IL-1 $\beta$  immunochrometry in those alveolar macrophages. Scale bar, 50  $\mu$ m. Data are means  $\pm$  SD from three mice. \* $P \leq 0.05$  by Kruskal-Wallis test. Data in (G) are representative of cells isolated from three mice.

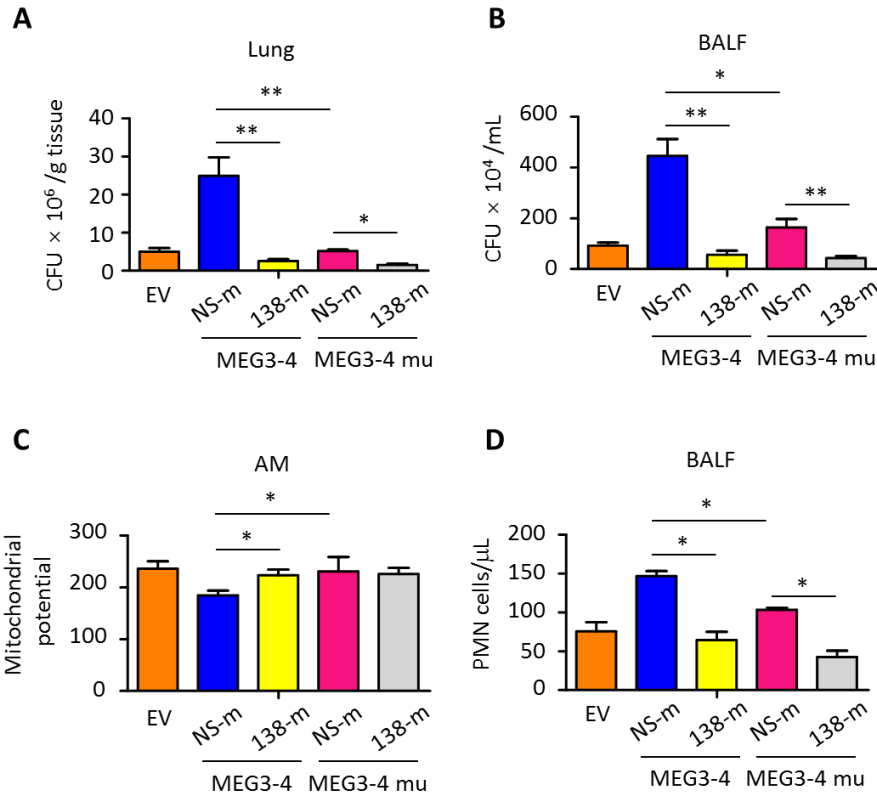

**Figure S11. MEG3-4 overexpression phenotypes in mice were reversed by treatment with 138-m.** (A-B) Bacterial burdens in the lungs and BALF from mice that were intranasally instilled with either stable MH-S cells expressing wild-type or mutant (mu) MEG3-4 and then were intravenously injected with vehicle containing either nonspecific control mimics (NS-m) or miR-138 mimics (138-m; 50  $\mu$ g per mouse) for 24 or 48 hours before PAO1 challenge (at  $5 \times 10^6$  CFU) for 24 hours ( $n=3$  mice per condition). (C) PMN percentages relative to total nuclear cells in BALF isolated from mice described in (A-B), measured with HEMA-3 staining. (D) Mitochondrial potential of alveolar macrophages isolated from mice described in (A-B), measured by JC-1 fluorescence assay. Data are means  $\pm$  SD of three mice.  $*P \leq 0.05$ ,  $**P \leq 0.01$  by Kruskal-Wallis test.



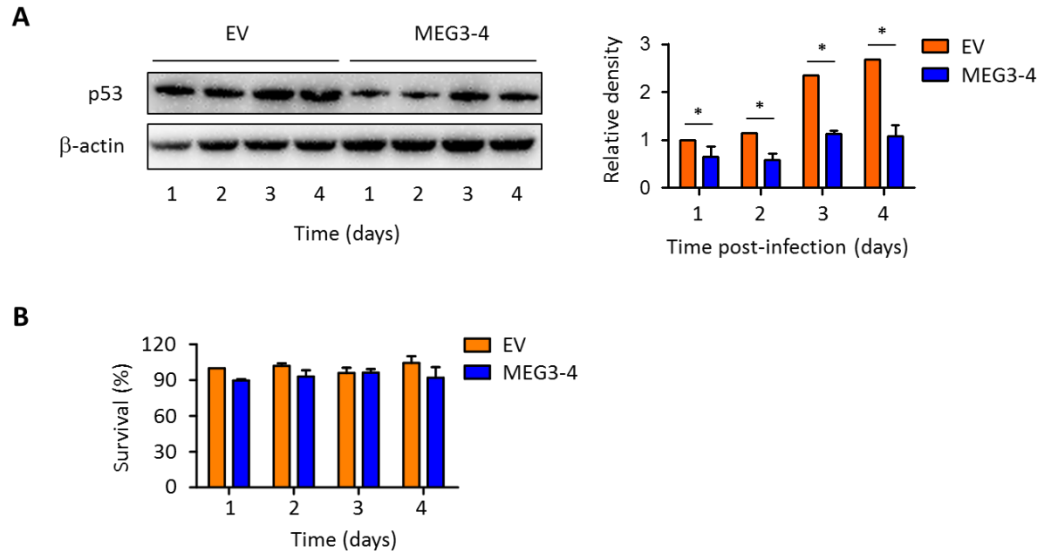

**Figure S13. MEG3-4 overexpression inhibits p53 expression in mouse B16 melanoma tumor cells.** (A) Immunoblotting for p53 in B16 cells assessed over 4 days in selection culture after a 24-hour transfection with pWT-MEG3 or empty vector (EV; pcDNA3-EGFP). (B) Viability of cells described in (A) as determined by MTT assay. Blot is representative and data are means  $\pm$  SD of three independent cell samples.  $*P \leq 0.05$  by Kruskal-Wallis test.

**Table S1. lncRNA expression in response to PAO1 infection.** Fold changes of regulated lncRNAs upon PAO1 infection in mouse lungs. Red highlights MEG3-4 analysis. Data are related to those shown in Figure 1.

| Gene symbol          | Fold Change<br>(PAO1 vs CTRL) | Gene symbol          | Fold Change<br>(PAO1 vs CTRL) |
|----------------------|-------------------------------|----------------------|-------------------------------|
| <i>1500012K07Rik</i> | 65.0274                       | <i>D930015M05Rik</i> | 10.7061                       |
| <i>1810019N24Rik</i> | 18.7371                       | <i>Dleu2</i>         | 3.1575                        |
| <i>1810058I24Rik</i> | 2.3404                        | <i>Dlx1as</i>        | 44.5694                       |
| <i>2010300F17Rik</i> | 20.6535                       | <i>Firre</i>         | 2.2416                        |
| <i>2210406O10Rik</i> | 20.909                        | <i>Gas5</i>          | 4.3984                        |
| <i>2310001H17Rik</i> | 4.4284                        | <i>Gm12116</i>       | 43.7018                       |
| <i>2500004C02Rik</i> | 13.5866                       | <i>Gm13111</i>       | 4.3528                        |
| <i>2900041M22Rik</i> | 30.5471                       | <i>Gm14204</i>       | 135.1969                      |
| <i>4921504A21Rik</i> | 23.5417                       | <i>Gm14379</i>       | 62.5014                       |
| <i>4930470G03Rik</i> | 45.8176                       | <i>Gm14705</i>       | 3.3951                        |
| <i>4930554H23Rik</i> | 47.6624                       | <i>Gm15050</i>       | 5.1656                        |
| <i>4930555B11Rik</i> | 68.0011                       | <i>Gm15832</i>       | 21.9342                       |
| <i>4930558J18Rik</i> | 84.0461                       | <i>Gm16023</i>       | 11.3067                       |
| <i>4931440J10Rik</i> | 86.0052                       | <i>Gm16575</i>       | 9.4167                        |
| <i>4932412D23Rik</i> | 65.4387                       | <i>Gm16754</i>       | 7.8118                        |
| <i>4933407K13Rik</i> | 10.1736                       | <i>Gm16892</i>       | 15.0422                       |
| <i>4933427G23Rik</i> | 47.6867                       | <i>Gm16933</i>       | 65.6773                       |
| <i>5530601H04Rik</i> | 6.4103                        | <i>Gm16998</i>       | 51.0418                       |
| <i>5730480H06Rik</i> | 6.1394                        | <i>Gm17275</i>       | 4.2265                        |
| <i>5830418P13Rik</i> | 38.8651                       | <i>Gm17337</i>       | 44.3548                       |
| <i>5830432E09Rik</i> | 11.8134                       | <i>Gm17354</i>       | 8.5083                        |
| <i>6820431F20Rik</i> | 5.7193                        | <i>Gm17388</i>       | 2.4207                        |
| <i>9330158H04Rik</i> | 3.4425                        | <i>Gm17473</i>       | 13.2815                       |
| <i>9430037G07Rik</i> | 13.0248                       | <i>Gm4117</i>        | 32.1516                       |
| <i>9530052C20Rik</i> | 6.9593                        | <i>Gm4211</i>        | 51.8984                       |
| <i>9530059O14Rik</i> | 31.1323                       | <i>Gm5602</i>        | 25.785                        |
| <i>9630001P10Rik</i> | 3.4786                        | <i>Gm6410</i>        | 16.8958                       |
| <i>A230107N01Rik</i> | 41.8523                       | <i>Gm6999</i>        | 56.7762                       |
| <i>A330023F24Rik</i> | 4.2369                        | <i>Hotair</i>        | 103.1528                      |
| <i>A430010J10Rik</i> | 135.3532                      | <i>Jpx</i>           | 12.6558                       |
| <i>A430108G06Rik</i> | 19.9442                       | <i>Pcsk2os1</i>      | 100.4333                      |
| <i>A930024N18Rik</i> | 18.2943                       | <i>Redrum</i>        | 77.4611                       |
| <i>Atxn7Iios2</i>    | 28.8071                       | <i>Rmst</i>          | 100.7064                      |
| <i>C130071C03Rik</i> | 13.8662                       | <i>Zfa-ps</i>        | 47.4371                       |
| <i>C330013F16Rik</i> | 9.6621                        | <i>Snora73b</i>      | 3.5776                        |
| <i>Ccdc41os1</i>     | 14.1056                       | <i>C130021I20Rik</i> | -2.6038                       |
| <i>Chd3os</i>        | 6.6091                        | <b><i>Meg3</i></b>   | <b>-18.1744</b>               |
| <i>D430036J16Rik</i> | 5.2575                        | <i>Rplp0</i>         | -4.6374                       |

**Table S2. Primers used in this study.** Sequences of the primers used in this study. F, forward; R, reverse; Mu, mutant.

| Name                                  | Sequence (5' to 3')                       |
|---------------------------------------|-------------------------------------------|
| <i>For plasmid construction</i>       |                                           |
| <i>pcDNA3-EGFP</i>                    |                                           |
| MEG3-4 F                              | CCCAAGCTTAGAATAAGTGGGGACAATG (Hind III)   |
| MEG3-4 R                              | CGGGATCCCCATTCTCCTTCCCCTTAAG (BamH I)     |
| <i>pMD19-T</i>                        |                                           |
| 138 F                                 | CAGGAAAAGTCTGCTATAGGAG                    |
| 138 R                                 | GGATGCTTGTTGCTTGCTGCTC                    |
| <i>pGL3</i>                           |                                           |
| MEG3-4 F                              | GCTCTAGAGTAGCTCTTGGGTGTGTC (Xba I)        |
| MEG3-4 R                              | AAGGCCGGCCCTCCATTCTCCTTCCCCTTAAG (Fse I)  |
| MEG3-4 Mu1                            | TGAGATAGCTAAATATCTTTTCAGGCTCAGGTGTTGATA   |
| MEG3-4 Mu2                            | TATCAACACCTGAGCCTGAAAGATATTTAGCTATCTCA    |
| IL1B F                                | GCTCTAGAAGTATGGGCTGGACTG (Xba I)          |
| IL1B R                                | AAGGCCGGCCGTTTTAATGAAATTTATTTC (Fse I)    |
| IL1B Mu1                              | TGGATGAGACTTTTACAGACGGGGTGTTAATACATTGCTTT |
| IL1B Mu2                              | AAAGCAATGTATTAACACCCCGTCTGTAAAAGTCTCATCCA |
| <i>For quantitative real-time PCR</i> |                                           |
| MEG3-1 F                              | GCACATGGAGACTGGAGCTA                      |
| MEG3-1 R                              | TCAGGACAGGGAGTTGTGAG                      |
| MEG3-2 F                              | TAAATGAACTGCAGCAGCCT                      |
| MEG3-2 R                              | GCGAGAGAATGGTTGAGACA                      |
| MEG3-3 F                              | CATCTGTGAAATGGGCTCAG                      |
| MEG3-3 R                              | GAAAGCACCATGAGCCACTA                      |
| MEG3-4 F                              | GGGACCATGGGTTTCATTTAC                     |
| MEG3-4 R                              | CACCCTAAATCACACAGCCA                      |
| MEG3-5 F                              | TGAACCAGTGCCCTAGTGAG                      |
| MEG3-5 R                              | GGAAAGGGCTCAGACTCAAG                      |
| MEG3-6 F                              | GGAAAGGGCTCAGACTCAAG                      |
| MEG3-6 R                              | AGGTGGGTCTCTCTACTCAAGG                    |
| MEG3-7 F                              | CTTGAGTCTGAGCCCTTTCC                      |
| MEG3-7 R                              | GGCAGCACTCCAGTTCACTA                      |
| MEG3-8 F                              | GAGGACTCCACCCACGAC                        |
| MEG3-8 R                              | GAGGACTCCACCCACGAC                        |
| MEG3-9 F                              | CTCGAAATCCTAGCCATCGT                      |
| MEG3-9 R                              | CCATGGACTCTCAAGGACAA                      |
| MEG3-10 F                             | CCATGGACTCTCAAGGACAA                      |
| MEG3-10 R                             | CCATGGACTCTCAAGGACAA                      |
| GAPDH F                               | ACAACCTTGGCATTGTGGAA                      |
| GAPDH R                               | GATGCAGGGATGATGTTCTG                      |
| IL1B F                                | CCAAAGAAGAGGGACAAAGG                      |



|            |                              |
|------------|------------------------------|
| IL1B R     | TGCTGGTGCTTCTTCTGTCT         |
| TNFa F     | GCCAACAACACCAGAAACAC         |
| TNFa R     | CTGGTCTTTCCGCCTCTTC          |
| IL6 F      | CCACGAAGAACGACAAAGAA         |
| IL6 R      | GGTCTTTCTTCCGCCTCTG          |
| ERK1 F     | TGCGACCTTAAGATCTGTGATT       |
| ERK1 R     | AGTGTGGTCGTGCTCAGG           |
| ERK2 F     | TGAAGTTGAACAGGCTCTGG         |
| ERK2 R     | AGTCGTCCAACCTCCATGTCA        |
| JNK1 F     | TCAAGCACCTTCACTCTGCT         |
| JNK1 R     | AGTCACCACATAAGGCGTCA         |
| JNK2 F     | GTGATTGATCCAGACAAGCG         |
| JNK2 R     | TTCCAACCTGGGCATCATAAA        |
| P50 F      | CCTCTCTCGTCTTCCTCCAC         |
| P50 R      | CCTCTCTCGTCTTCCTCCAC         |
| P65 F      | CTCACCGGCCTCATCCACAT         |
| P65 R      | TTGGTCTGGATTGCTGGCT          |
| Stat3 F    | TCGTGGAGCTGTTCAGAAAC         |
| Stat3 R    | GGAAATTTGACCAGCAACCT         |
| miR-129-5p | CTTTTTGCGGTCTGGGCTTGC        |
| miR-136    | TAATGCCCTAAAAATCCTTAT        |
| miR-138    | AGCTGGTGTGTGAATAGGCCG        |
| miR-770    | AGCACCACGTGTCTGGGCCACG       |
| miR-1906-1 | TGCAGCAGCCTGAGGCAGGGCT       |
| Sno202     | GTTGGCTCTGGTGCAGGGTCCGAGGTAT |

---

***For Northern blotting and ISH***

|                |                                  |
|----------------|----------------------------------|
| MEG3 general   | GTCCTCAGTCTTCTTTTCTTCAGCCGGCATGG |
| MEG3-4 special | GCTTGGGGGGGGGGGGCAGAGCCCACATCA   |
| miR-138        | CGGCCTGATTCACAACACCAGCT          |
| Sno202         | ATACCTCGGACCCTGCACCAGAGCCAAC     |

---

***For CLIP and LAMP assay***

|              |                                                                              |
|--------------|------------------------------------------------------------------------------|
| MEG3-4 F     | GAGAGAGAGAACAGCGAGAATTCTG                                                    |
| MEG3-4 R     | GTGCACAGATTTAGTTGAAGCCTG                                                     |
| IL1B F       | GATGAATTGGTCATAGCCCGCAC                                                      |
| IL1B R       | GTTTGTTTTAATGAAATTTATTTC                                                     |
| miR-138      | AGCTGGTGTGTGAATAGGCCG                                                        |
| GAPDH F      | ACAACCTTGGCATTGTGGAA                                                         |
| GAPDH R      | GATGCAGGGATGATGTTCTG                                                         |
| miR-302b     | ACTTTAACATGGGAATGCTTTCT                                                      |
| IRAK4 F      | ACTTCTCGAGAACCTGGAGACCGG                                                     |
| IRAK4 R      | GTGCCAACTCGTCTATTAATAAC                                                      |
| miR-138 pro  | DIG-cagcugguguugugaaucaaggccgacgagcagcgcgcauccucuuaaccggcuuuucacgacaccagguug |
| miR-302b pro | DIG-guucccucaacuuaacaugggaugcuuucugucucaucgaagaguaagugcuucauguuuuaguagaagu   |

---

***For human macrophages***

|            |                        |
|------------|------------------------|
| MEG3-18 F  | GCACTCCGCTTTGCTCTGTC   |
| MEG3-18 R  | CAGAGGGCTGTGGAGCTGAG   |
| IL1B F     | GCGAGGGAGAACTGGCAGA    |
| IL1B R     | GCCATGGCTGCTTCAGACAC   |
| miR-330-5p | TCTCTGGGCCTGTGTCTTAGGC |
| GAPDH F    | CGGGAAACTGTGGCGTGATG   |
| GAPDH R    | ATGACCTTGCCCACAGCCTT   |

---
